# Supplementary material for: Risk of Preeclampsia and Adverse Pregnancy Outcomes after Heterologous Egg Donation: Hypothesizing a Role for Kidney Function and Comorbidity
Source: PubMed Central journal article supplement (PMC6912476; doi:10.3390/jcm8111806), 2019-10-28
Supplement: jcm-08-01806-s001.pdf [file jcm-08-01806-s001.pdf]

**Table S1.** Multivariate analysis of the different outcomes: all cases.

| <b>PREECLAMPSIA</b>              |                                              | <b>Sig.</b>  | <b>Exp(B)</b> | <b>CI 95% EXP(B)</b> |               |
|----------------------------------|----------------------------------------------|--------------|---------------|----------------------|---------------|
|                                  |                                              |              |               | <b>Lower</b>         | <b>Higher</b> |
| 1st step                         | Age (dichotomised at the median)             | 0.326        | 1.456         | 0.688                | 3.082         |
|                                  | BMI (dichotomised at 30 kg·m <sup>-2</sup> ) | 0.306        | 1.781         | 0.589                | 5.381         |
|                                  | Parity (1st vs. other)                       | 0.165        | 0.236         | 0.031                | 1.807         |
|                                  | Comorbidity (renal and other)                | 0.056        | 2.355         | 0.979                | 5.667         |
| 2nd step                         | BMI (dichotomised at 30 kg·m <sup>-2</sup> ) | 0.277        | 1.845         | 0.611                | 5.569         |
|                                  | Parity (1st vs. other)                       | 0.171        | 0.242         | 0.032                | 1.845         |
|                                  | Comorbidity (renal and other)                | 0.061        | 2.310         | 0.961                | 5.550         |
| 3rd step                         | Parity (1st vs. other)                       | 0.152        | 0.227         | 0.030                | 1.725         |
|                                  | <b>Comorbidity (renal and other)</b>         | <b>0.035</b> | <b>2.513</b>  | <b>1.066</b>         | <b>5.923</b>  |
| <b>Delivery &lt; 37 weeks</b>    |                                              | <b>Sig.</b>  | <b>Exp(B)</b> | <b>CI 95% EXP(B)</b> |               |
|                                  |                                              |              |               | <b>Lower</b>         | <b>Higher</b> |
| 1st step                         | Age (dichotomised at the median)             | 0.910        | 0.963         | 0.504                | 1.840         |
|                                  | BMI (dichotomised at 30 kg·m <sup>-2</sup> ) | 0.694        | 1.244         | 0.418                | 3.700         |
|                                  | Parity (1st vs. other)                       | 0.914        | 0.946         | 0.342                | 2.615         |
|                                  | Comorbidity (renal and other)                | 0.023        | 2.477         | 1.136                | 5.398         |
| 2nd step                         | Age (dichotomised at the median)             | 0.907        | 0.962         | 0.504                | 1.837         |
|                                  | BMI (dichotomised at 30 kg·m <sup>-2</sup> ) | 0.685        | 1.252         | 0.423                | 3.703         |
|                                  | Comorbidity (renal and other)                | 0.021        | 2.487         | 1.145                | 5.402         |
| 3rd step                         | BMI (dichotomised at 30 kg·m <sup>-2</sup> ) | 0.689        | 1.247         | 0.423                | 3.682         |
|                                  | Comorbidity (renal and other)                | 0.021        | 2.490         | 1.147                | 5.407         |
| <b>4th step</b>                  | <b>Comorbidity (renal and other)</b>         | <b>0.015</b> | <b>2.565</b>  | <b>1.198</b>         | <b>5.488</b>  |
| <b>Small for gestational age</b> |                                              | <b>Sig.</b>  | <b>Exp(B)</b> | <b>CI 95% EXP(B)</b> |               |
|                                  |                                              |              |               | <b>Lower</b>         | <b>Higher</b> |
| 1st step                         | Age (dichotomised at the median)             | 0.757        | 0.876         | 0.380                | 2.020         |
|                                  | BMI (dichotomised at 30 kg·m <sup>-2</sup> ) | 0.291        | 0.325         | 0.040                | 2.617         |
|                                  | Parity (1st vs. other)                       | 0.484        | 0.586         | 0.131                | 2.622         |
|                                  | Comorbidity (renal and other)                | 0.048        | 2.634         | 1.011                | 6.866         |
| 2nd step                         | BMI (dichotomised at 30 kg·m <sup>-2</sup> ) | 0.287        | 0.322         | 0.040                | 2.588         |
|                                  | Parity (1st vs. other)                       | 0.478        | 0.581         | 0.130                | 2.602         |
|                                  | Comorbidity (renal and other)                | 0.047        | 2.637         | 1.012                | 6.868         |
| 3rd step                         | BMI (dichotomised at 30 kg·m <sup>-2</sup> ) | 0.306        | 0.337         | 0.042                | 2.704         |
|                                  | Comorbidity (renal and other)                | 0.039        | 2.735         | 1.054                | 7.098         |
| <b>4th step</b>                  | <b>Comorbidity (renal and other)</b>         | <b>0.060</b> | <b>2.453</b>  | <b>0.961</b>         | <b>6.257</b>  |

First and last step shown in tables (complete analysis). Significant results in bold.

**Table S2.** Multivariate analysis of the different outcomes: cases with creatinine assessment (complete analysis).

| <b>PREECLAMPSIA</b>              |                                              | <b>Sig.</b>      | <b>Exp(B)</b> | <b>CI 95% EXP(B)</b> |               |
|----------------------------------|----------------------------------------------|------------------|---------------|----------------------|---------------|
|                                  |                                              |                  |               | <b>Lower</b>         | <b>Higher</b> |
| 1st step                         | Age (dichotomised at the median)             | 0.472            | 1.342         | 0.603                | 2.986         |
|                                  | BMI (dichotomised at 30 kg·m <sup>-2</sup> ) | 0.339            | 1.478         | 0.664                | 3.291         |
|                                  | Parity (1st vs. other)                       | 0.312            | 0.340         | 0.042                | 2.756         |
|                                  | Comorbidity (renal and other)                | 0.880            | 1.063         | 0.480                | 2.357         |
|                                  | sCreat. (dichotomised at the median)         | <0.001           | 15.809        | 4.631                | 53.968        |
| 2nd step                         | Age (dichotomised at the median)             | 0.478            | 1.335         | 0.602                | 2.961         |
|                                  | BMI (dichotomised at 30 kg·m <sup>-2</sup> ) | 0.340            | 1.476         | 0.663                | 3.284         |
|                                  | Parity (1st vs. other)                       | 0.309            | 0.338         | 0.042                | 2.734         |
|                                  | sCreat. (dichotomised at the median)         | <0.001           | 15.975        | 4.714                | 54.136        |
| 3rd step                         | BMI (dichotomised at 30 kg·m <sup>-2</sup> ) | 0.387            | 1.417         | 0.643                | 3.122         |
|                                  | Parity (1st vs. other)                       | 0.313            | 0.341         | 0.042                | 2.758         |
|                                  | sCreat. (dichotomised at the median)         | <0.001           | 16.191        | 4.783                | 54.808        |
| 4th step                         | Parity (1st vs. other)                       | 0.315            | 0.343         | 0.042                | 2.764         |
|                                  | sCreat. (dichotomised at the median)         | <0.001           | 16.142        | 4.773                | 54.596        |
| <b>5th step</b>                  | <b>sCreat. (dichotomised at the median)</b>  | <b>&lt;0.001</b> | <b>17.277</b> | <b>5.125</b>         | <b>58.238</b> |
| <b>Delivery &lt; 37 weeks</b>    |                                              | <b>Sig.</b>      | <b>Exp(B)</b> | <b>CI 95% EXP(B)</b> |               |
|                                  |                                              |                  |               | <b>Lower</b>         | <b>Higher</b> |
| 1st step                         | Age (dichotomised at the median)             | 0.864            | 1.075         | 0.467                | 2.474         |
|                                  | BMI (dichotomised at 30 kg·m <sup>-2</sup> ) | 0.616            | 0.689         | 0.161                | 2.955         |
|                                  | Parity (1st vs. other)                       | 0.972            | 1.031         | 0.186                | 5.711         |
|                                  | Comorbidity (renal and other)                | 0.346            | 1.596         | 0.603                | 4.224         |
|                                  | sCreat. (dichotomised at the median)         | 0.062            | 2.315         | 0.958                | 5.593         |
| 2nd step                         | Age (dichotomised at the median)             | 0.864            | 1.075         | 0.467                | 2.474         |
|                                  | BMI (dichotomised at 30 kg·m <sup>-2</sup> ) | 0.614            | 0.688         | 0.161                | 2.944         |
|                                  | Comorbidity (renal and other)                | 0.342            | 1.592         | 0.610                | 4.154         |
|                                  | sCreat. (dichotomised at the median)         | 0.062            | 2.317         | 0.960                | 5.590         |
| 3rd step                         | BMI (dichotomised at 30 kg·m <sup>-2</sup> ) | 0.605            | 0.682         | 0.160                | 2.912         |
|                                  | Comorbidity (renal and other)                | 0.348            | 1.583         | 0.607                | 4.125         |
|                                  | sCreat. (dichotomised at the median)         | 0.062            | 2.315         | 0.959                | 5.585         |
| 4th step                         | Comorbidity (renal and other)                | 0.396            | 1.502         | 0.587                | 3.845         |
|                                  | sCreat. (dichotomised at the median)         | 0.067            | 2.278         | 0.945                | 5.491         |
| <b>5th step</b>                  | <b>sCreat. (dichotomised at the median)</b>  | <b>0.029</b>     | <b>2.545</b>  | <b>1.1</b>           | <b>5.892</b>  |
| <b>Small for gestational age</b> |                                              | <b>Sig.</b>      | <b>Exp(B)</b> | <b>CI 95% EXP(B)</b> |               |
|                                  |                                              |                  |               | <b>Lower</b>         | <b>Higher</b> |
| 1st step                         | Age (dichotomised at the median)             | 0.550            | 1.402         | 0.463                | 4.243         |
|                                  | BMI (dichotomised at 30 kg·m <sup>-2</sup> ) | 0.585            | 0.543         | 0.061                | 4.865         |
|                                  | Parity (1st vs. other)                       | 0.779            | 1.377         | 0.148                | 12.830        |
|                                  | Comorbidity (renal and other)                | 0.082            | 3.038         | 0.867                | 10.644        |
|                                  | sCreat. (dichotomised at the median)         | 0.535            | 0.687         | 0.210                | 2.251         |
| 2nd step                         | Age (dichotomised at the median)             | 0.549            | 1.403         | 0.464                | 4.245         |
|                                  | BMI (dichotomised at 30 kg·m <sup>-2</sup> ) | 0.576            | 0.536         | 0.060                | 4.776         |
|                                  | Comorbidity (renal and other)                | 0.085            | 2.938         | 0.861                | 10.025        |
|                                  | sCreat. (dichotomised at the median)         | 0.545            | 0.693         | 0.212                | 2.268         |
| 3rd step                         | Age (dichotomised at the median)             | 0.503            | 1.457         | 0.484                | 4.381         |
|                                  | Comorbidity (renal and other)                | 0.098            | 2.817         | 0.826                | 9.612         |
|                                  | sCreat. (dichotomised at the median)         | 0.498            | 0.664         | 0.203                | 2.172         |
| 4th step                         | Comorbidity (renal and other)                | 0.106            | 2.750         | 0.805                | 9.393         |
|                                  | sCreat. (dichotomised at the median)         | 0.483            | 0.653         | 0.199                | 2.145         |
| <b>5th step</b>                  | <b>Comorbidity (renal and other)</b>         | <b>0.141</b>     | <b>2.333</b>  | <b>0.755</b>         | <b>7.210</b>  |

Significant results in bold.
